# Supplementary material for: Introduction of stereocomplex crystallites of PLA for the solid and microcellular poly(lactide)/poly(butylene adipate-co-terephthalate) blends
Source: Royal Society of Chemistry journal article supplement (doi:10.1039/c8ra01570h), 2018-01-01
Supplement: c8ra01570h1.pdf [file c8ra01570h1.pdf]

## Supporting Information

**Table S1** Thermal parameters of PLLA/PBAT-based blends during the first and second DSC heating cycles

**Table S2** Solubility of supercritical carbon dioxide in PLLA, PBAT and their blends

**Figure S1** Frequency dependence of loss modulus  $G''$  of PLLA, PLLA/PBAT and PLLA/PBAT/PDLA at 190 °C

**Figure S2** Cross-over points for curves of  $G'$  and  $G''$  as a function of frequency for PLLA/PBAT 9/1 systems with different PDLA

**Figure S3** Cross-over points for curves of  $G'$  and  $G''$  as a function of frequency for PLLA/PBAT 8/2 systems with different PDLA

Table S1 Thermal parameters of PLLA/PBAT-based blends during the first and second DSC heating cycles

| Sample name               | T <sub>cc</sub> | T <sub>ex</sub> | T <sub>m</sub> | ΔH <sub>c</sub> | ΔH <sub>m</sub> | X <sub>c</sub> | T <sub>scm</sub> | ΔH <sub>sc-m</sub> |
|---------------------------|-----------------|-----------------|----------------|-----------------|-----------------|----------------|------------------|--------------------|
| <b>The first heating</b>  |                 |                 |                |                 |                 |                |                  |                    |
| PLLA/PBAT 9/1             | 92.8            | 157.7           | 174.3          | 33.44           | 41.11           | 9.17%          |                  |                    |
| PLLA/PBAT 8/2             | 92.9            | 158.5           | 174.9          | 27.66           | 36.48           | 11.86%         |                  |                    |
| PLLA/PBAT 7/3             | 89.3            | 158.6           | 175.7          | 19.66           | 27.90           | 12.68%         |                  |                    |
| PLLA/PBAT 5/5             | -               | 156.4           | 174.7          | 0               | 16.49           | 35.47%         |                  |                    |
| PLLA/PBAT 9/1+5% PDLA     | 90.4            | 158.6           | 176.3          | 20.88           | 25.85           |                | 222.8            | 7.43               |
| PLLA/PBAT 9/1+10% PDLA    | 90.6            | 158.4           | 175.6          | 18.89           | 25.44           |                | 233.1            | 8.27               |
| PLLA/PBAT 8/2+5% PDLA     | 90.8            | 158.4           | 176.2          | 19.6            | 24.6            |                | 229.21           | 8.93               |
| PLLA/PBAT 8/2+10% PDLA    | 91              | 158.8           | 176            | 18.02           | 23.92           |                | 230.1            | 9.75               |
| <b>The second heating</b> |                 |                 |                |                 |                 |                |                  |                    |
| PLLA/PBAT 9/1             | 95.4            | 158.2           | 174.1          | 15.04           | 40.50           | 30.41%         |                  |                    |
| PLLA/PBAT 8/2             | 95.1            | 159             | 174.4          | 8.95            | 32.63           | 31.83%         |                  |                    |
| PLLA/PBAT 7/3             | 94.1            | 159.2           | 175.1          | 5.4             | 27.08           | 33.30%         |                  |                    |
| PLLA/PBAT 5/5             | 97.6            | 158.6           | 174.5          | 3.74            | 17.67           | 29.96%         |                  |                    |
| PLLA/PBAT 9/1+5% PDLA     | 95.4            | 157.8           | 174.1          | 27.84           | 28.36           |                |                  |                    |
| PLLA/PBAT 9/1+10% PDLA    | 94.9            | 157.4           | 173.5          | 25.75           | 26.63           |                |                  |                    |
| PLLA/PBAT 8/2+5% PDLA     | 95.3            | 157.9           | 174            | 25.41           | 26.45           |                |                  |                    |
| PLLA/PBAT 8/2+10% PDLA    | 94.9            | 157.6           | 173.8          | 24.27           | 25.4            |                |                  |                    |

Table S2 Solubility of supercritical carbon dioxide in PLLA, PBAT and their blends

| Samples                                                          | PLLA  | PLLA/PBAT<br>9/1 | PLLA/PBAT<br>8/2 | PLLA/PBAT<br>7/3 | PLLA/PBAT<br>5/5 | PBAT  |
|------------------------------------------------------------------|-------|------------------|------------------|------------------|------------------|-------|
| <sup>a</sup> Gas solubility<br>(g CO <sub>2</sub> /100g polymer) | 22.60 | 21.24            | 19.87            | 18.51            | 15.78            | 8.95  |
| <sup>b</sup> Gas solubility<br>(g CO <sub>2</sub> /100g polymer) | ----  | 21.09            | 18.90            | 18.40            | 16.5             | ----- |

**Note:** <sup>a</sup> means the gas solubility determined by the experiments, while <sup>b</sup> means the calculated gas solubility considering the weight percentage according to this equation:

Solubility of binary blends = Solubility of CO<sub>2</sub> in pure PLLA × Weight percent of PLLA + Solubility of CO<sub>2</sub> in pure PBAT × (1 - Weight percent of PLLA)

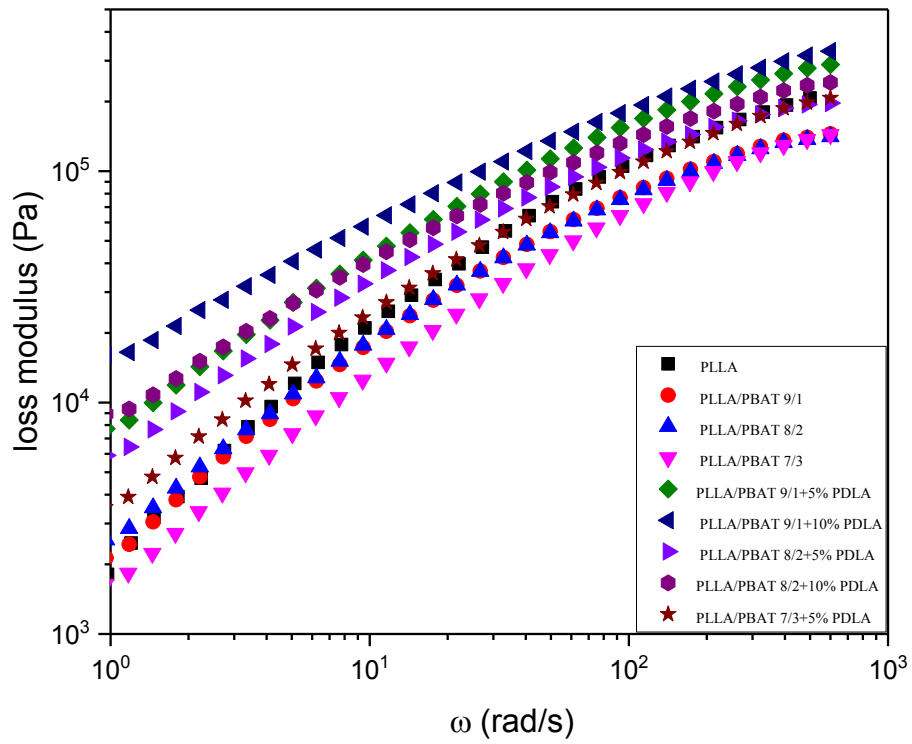

Figure S1 Frequency dependences of loss modulus  $G''$  of PLLA, PLLA/PBAT and PLLA/PBAT/PDLA at 190 °C

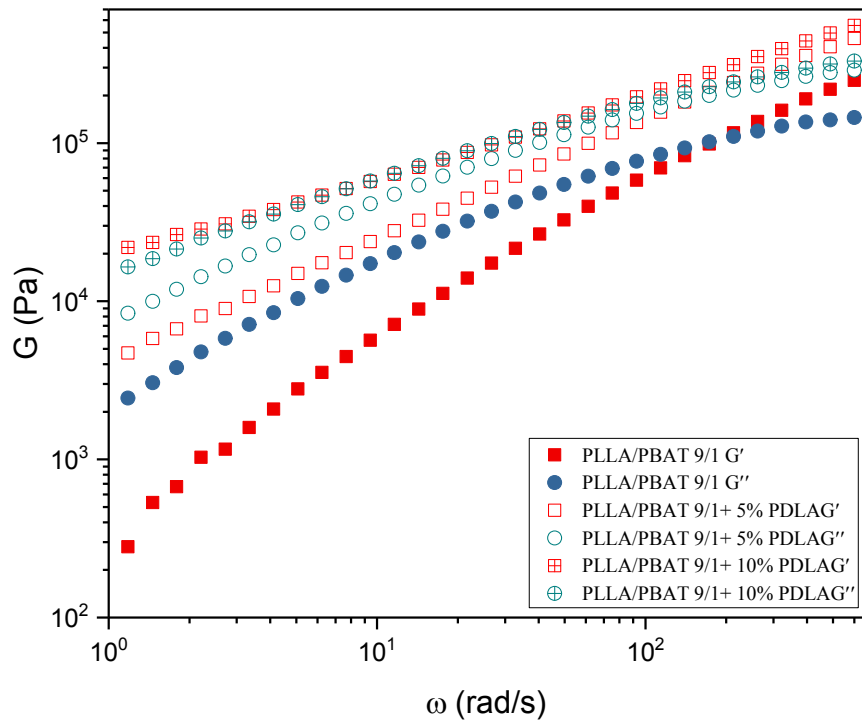

Figure S2 Cross-over points for curves of  $G'$  and  $G''$  as a function of frequency for PLLA/PBAT 9/1 systems with different PDLA

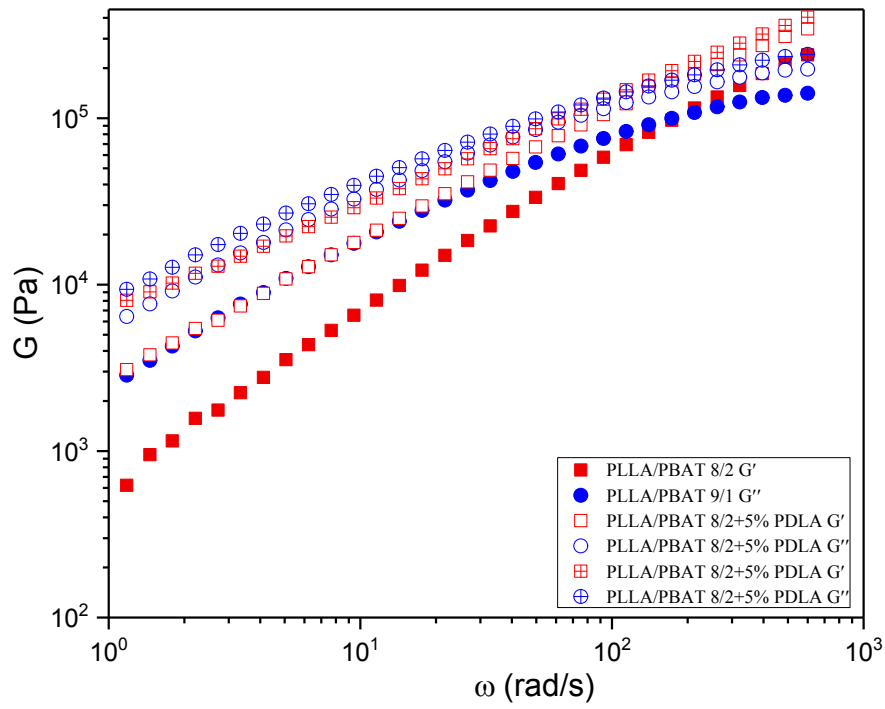

Figure S3 Cross-over points for curves of  $G'$  and  $G''$  as a function of frequency for PLLA/PBAT 8/2 systems with different PDLA
